# Supplementary material
Source: PubMed Central journal article supplement (PMC2948869)
Supplement: NIHMS223317-supplement-Supp1.pdf [file NIHMS223317-supplement-Supp1.pdf]

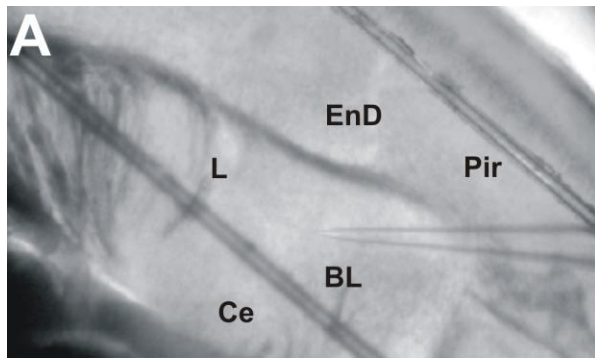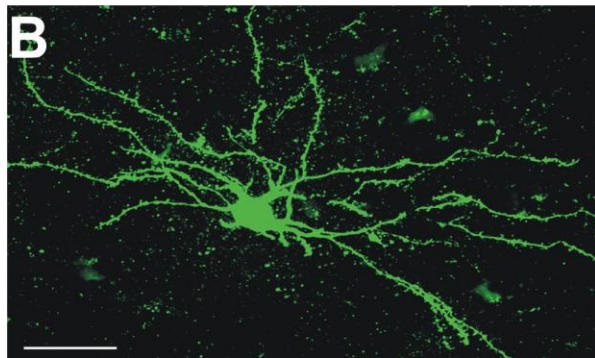

**Supplemental Figure 1.** Morphological identification of excitatory neurons in the BL amygdala. (A) DIC image of the lateral (L) and basolateral (BL) nuclei of the amygdala in a coronal brain slice used for electrophysiological recordings. (B) Representative cell from an *Fmr1* KO mouse filled with biocytin, exhibiting the characteristic morphology of a BL amygdala principal excitatory neuron. The position of this cell in the BL amygdala is identified by the position of the recording electrode in (A). Ce, central nucleus; EnD, endopiriform nucleus; Pir, piriform cortex. Scale bar: 50  $\mu$ m.

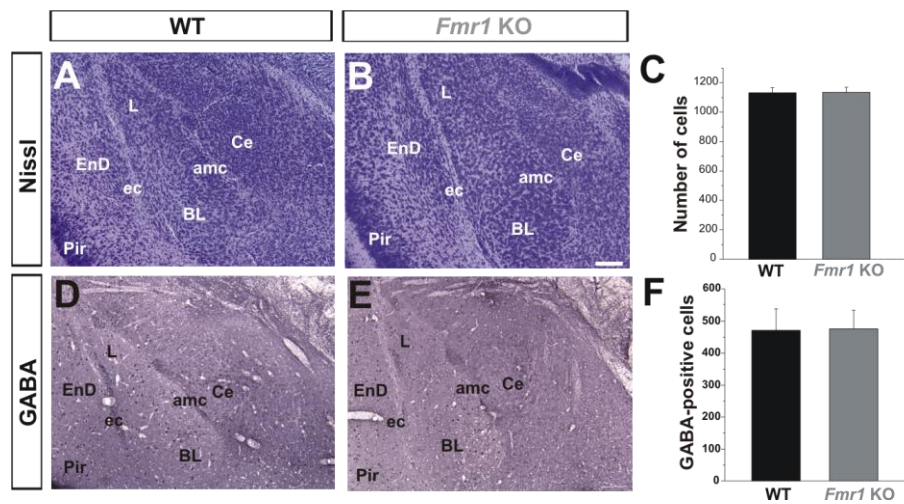

**Supplemental Figure 2.** Numbers of Nissl-stained and Gamma-aminobutyric acid (GABA)-positive cells are unchanged in *Fmr1* KO mice. Nissl stains of P21 brains from WT (A) and *Fmr1* KO (B) indicate qualitatively normal development of the lateral and basolateral amygdala at the cytoarchitectonic level. Counts also revealed no quantitative difference in cell numbers in the basolateral nucleus (C, n=5 WT, 5 *Fmr1* KO). GABA immunostaining of P21 brains from controls (D) and *Fmr1* KO (E) indicate qualitatively normal development of the basolateral amygdala. Counts also revealed no quantitative difference in cell numbers in basolateral nucleus (F, n=5 WT, 5 *Fmr1* KO). 12 sections were counted from each brain. amc, amygdalar capsule; BL, basolateral nucleus of the amygdala; Ce, central nucleus of the amygdala; ec, external capsule; EnD, endopiriform nucleus; L, lateral nucleus of the amygdala; Pir, piriform cortex. Scale bar: 100  $\mu$ m.

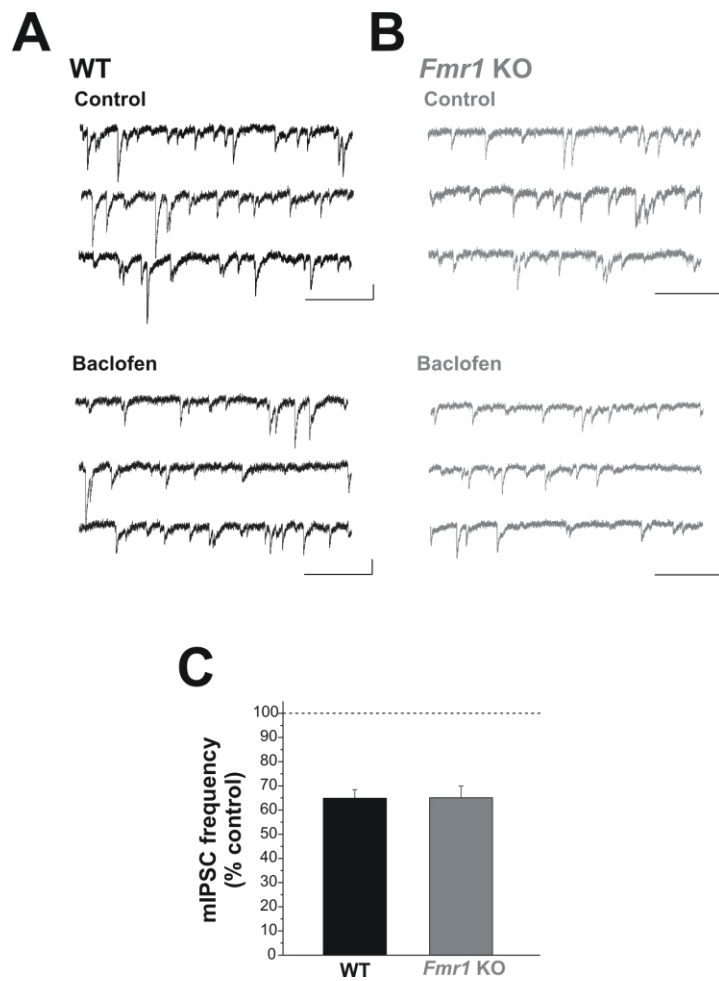

**Supplemental Figure 3.** Presynaptic GABA<sub>B</sub> receptor-mediated inhibition is normal in *Fmr1* KO mice. (A,B) Continuous traces illustrating mIPSC frequency under control conditions (top traces) and in the presence of Baclofen (1  $\mu$ M, bottom traces) in WT (A) and *Fmr1* KO (B) mice. (C) Averaged group data. mIPSC frequency in Baclofen is reduced to the same extent in WT and *Fmr1* KOs, as compared to control conditions (WT:  $64.91 \pm 3.46\%$  control, n=7; *Fmr1* KO:  $65.12 \pm 4.79\%$  control, n=3; p=0.97). Scale bars: 25 pA, 500 ms.
